# Supplementary material for: Significant promotion of porous architecture and magnetic Fe3O4 NPs inside honeycomb-like carbonaceous composites for enhanced microwave absorption
Source: Royal Society of Chemistry journal article supplement (doi:10.1039/c8ra00913a), 2018-01-01
Supplement: c8ra00913a1.pdf [file c8ra00913a1.pdf]

## Supporting Information

# **Significant promotion of porous architecture and magnetic Fe<sub>3</sub>O<sub>4</sub> NPs inside honeycomb-like carbonaceous composites for enhanced microwave absorption**

Shengshuai Gao <sup>a</sup>, Qingda An <sup>a,\*</sup>, Zuoyi Xiao <sup>a</sup>, Shangru Zhai <sup>a,\*</sup>, Zhan Shi <sup>b</sup>

*<sup>a</sup> Faculty of Light Industry and Chemical Engineering, Dalian Polytechnic University,*

*Dalian 116034, China*

*<sup>b</sup> State Key Laboratory of Inorganic Synthesis and Preparative Chemistry, College of*

*Chemistry, Jilin University, Changchun 130012, China*

\*Corresponding authors.

E-mail: [anqingdachem@163.com](mailto:anqingdachem@163.com) (Q.-D. An); [zhairschem@163.com](mailto:zhairschem@163.com) (S.-R. Zhai)

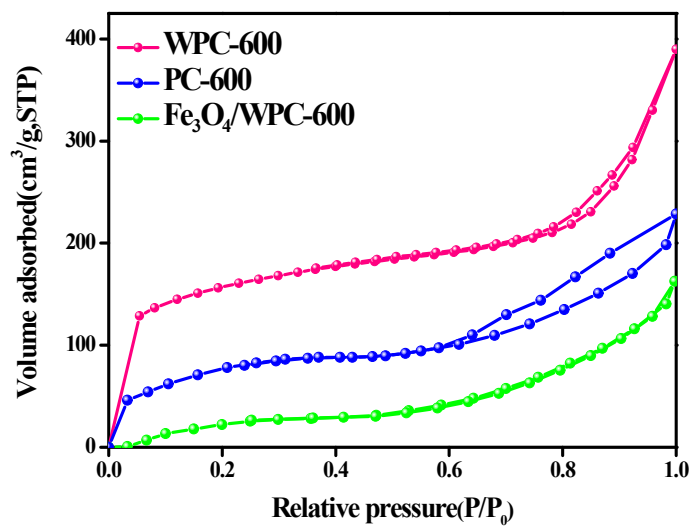

Fig. S1. Nitrogen adsorption - desorption isotherms of as-prepared samples under different conditions.

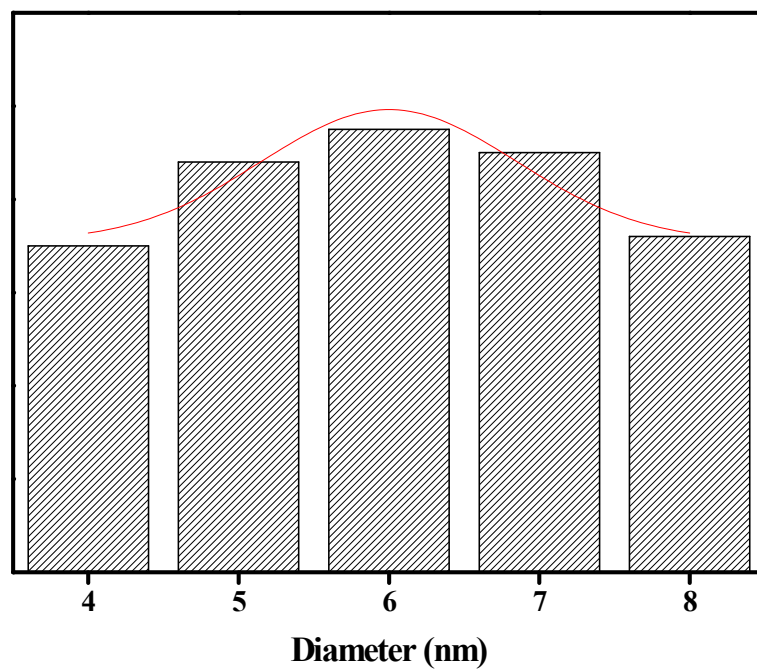

Fig. S2. Size distributions of  $\text{Fe}_3\text{O}_4$  nano-particles for  $\text{Fe}_3\text{O}_4/\text{WPC-600}$  composites.

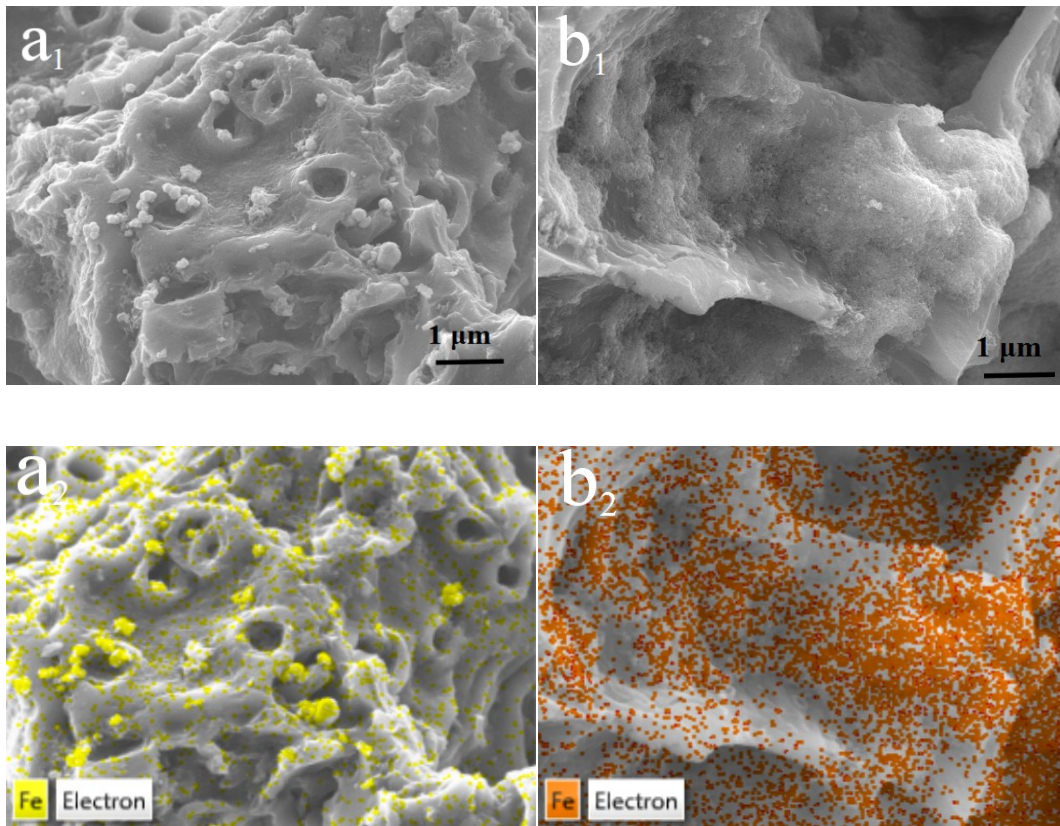

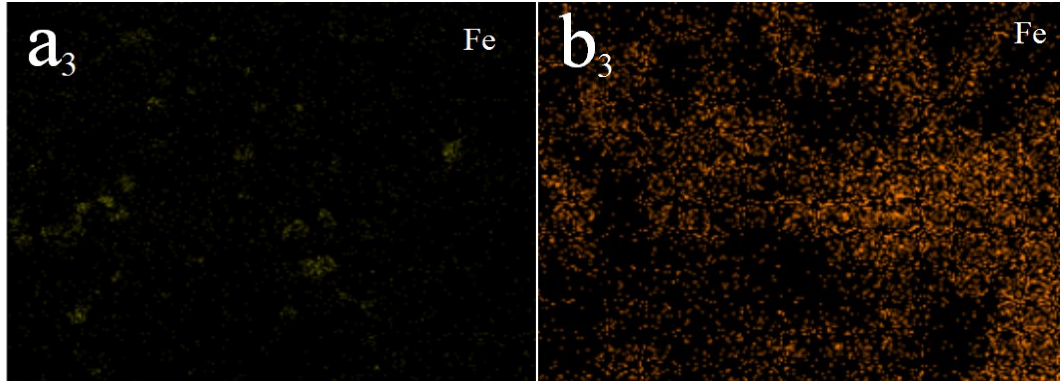

Fig. S3 SEM images of 0.5-Fe<sub>3</sub>O<sub>4</sub>/WPC-600 ( $a_1$ ), 2-Fe<sub>3</sub>O<sub>4</sub>/WPC-600 ( $b_1$ ), EDS elemental mapping images of 0.5-Fe<sub>3</sub>O<sub>4</sub>/WPC-600 ( $a_2$  and  $a_3$ ) and 2-Fe<sub>3</sub>O<sub>4</sub>/WPC-600 ( $b_2$  and  $b_3$ )

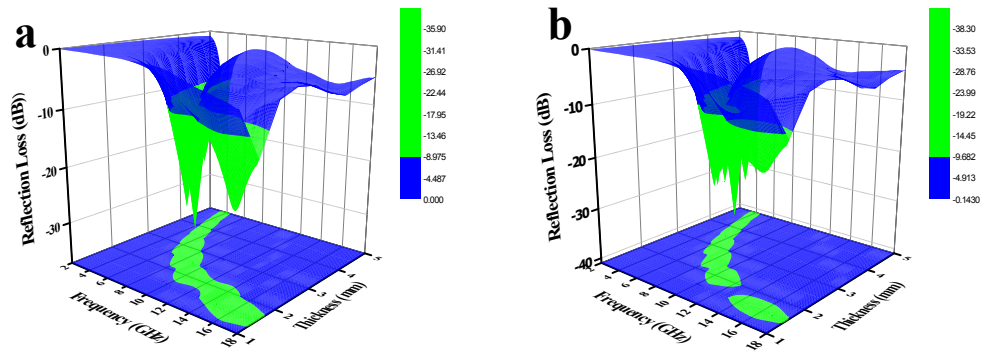

Fig. S4 Three-dimension images of calculated RL values of (a) 0.5-Fe<sub>3</sub>O<sub>4</sub>/WPC-600 and (b) 2-Fe<sub>3</sub>O<sub>4</sub>/WPC-600.

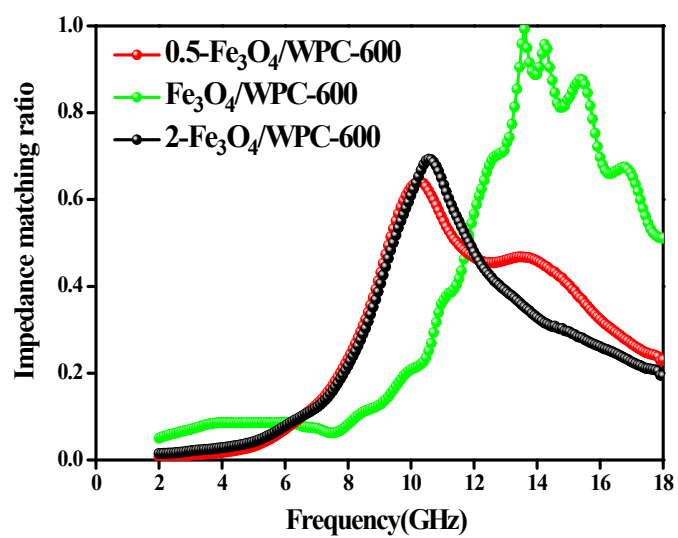

Fig. S5 The modulus of normalized input impedance of the products.

Table S1 The conductivity  $\sigma$  of samples.

| Sample         | PC-600                | WPC-600               | 0.5-Fe <sub>3</sub> O <sub>4</sub> /WPC-600 | Fe <sub>3</sub> O <sub>4</sub> /WPC-600 | 2-Fe <sub>3</sub> O <sub>4</sub> /WPC-600 |
|----------------|-----------------------|-----------------------|---------------------------------------------|-----------------------------------------|-------------------------------------------|
| $\sigma$ (S/m) | $1.27 \times 10^{-7}$ | $6.23 \times 10^{-5}$ | $7.45 \times 10^{-5}$                       | $1.16 \times 10^{-4}$                   | $4.06 \times 10^{-4}$                     |
